# Supplementary material
Source: PubMed Central journal article supplement (PMC4859093)
Supplement: supp_113.205120_205120_Supplementary_figure_1.pdf [file supp_113.205120_205120_Supplementary_figure_1.pdf]

supplementary figure 1

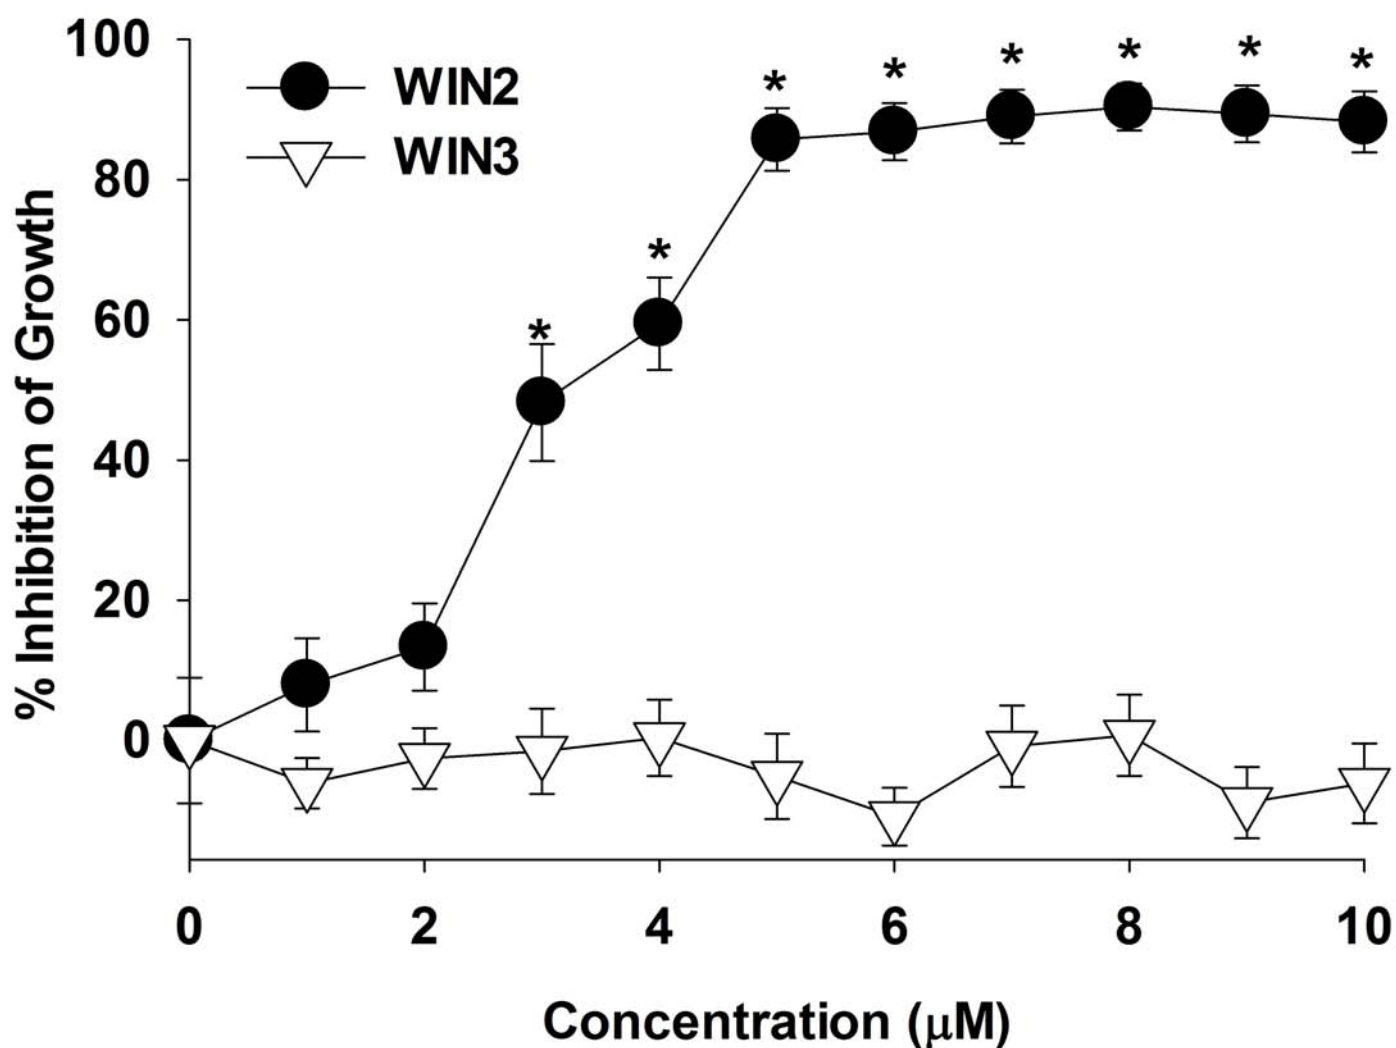

**Supplementary figure 1 – Influence of low serum (0.1%) conditions on response of MCF-7 cells to WIN2 and WIN3.** MCF-7 cells were treated with WIN2 (1-10μM) and WIN3 (1-10μM) and cell growth monitored by the crystal violet assay 96 h after treatment. Data presented reflect the means of 3 individual experiments + se; \*=p<0.05 vs WIN3 at each respective concentration of drug

Combined antiproliferative effects of the aminoalkylindole WIN55,212-2 and radiation in breast cancer cells

Sean M. Emery, Moureq R. Alotaibi, Qing Tao, Dana E. Selley, Aron H. Lichtman and David A. Gewirtz

The Journal of Pharmacology and Experimental Therapeutics - 2013
